# Supplementary material
Source: HighWire-hosted journal article supplement (https://bmjopen.bmj.com/content/10/4/e034699)
Supplement: inline-supplementary-material-1 [file inline-supplementary-material-1.pdf]

## Supplementary File 1: Focus group schedule

[Questions may be omitted to suit time constraints or the flow of the discussion.]

### Introduction

Thank you for coming to the focus group today. The purpose of the group is to talk about the new model of eye care being delivered at the XX Hospital and how you as staff members perceive it to be operating. The focus group will be audio-recorded, but please speak freely. Your answers will not be linked to you specifically but “Participant #1, 2 etc”

1. Could you please tell us about yourself? (Prompt: profession, role within the clinic, time since qualifying)
2. Could you please explain your understanding of how the new eye clinic works?
3. What are you hoping the new clinic will achieve?
4. What patients are most suited to the new clinic and how are they referred to you?
5. How does their care vary from how they would have been seen prior to the establishment of the clinic?
6. With whom do you have contact outside the clinic? What are the channels of communication and at what times in the patient journey? (Prompt: e.g., communication back to referrer after treatment)
7. What are your experiences thus far with the establishment of the clinic? Have you met with any resistance? If so, from whom? What were their concerns?
8. Can you detail the scope of practice for optometrists in the clinic? Are there formal criteria that trigger consultation with an ophthalmologist? How is that done? (Prompt: Walk down the hall and talk, send an email, formal letter...) Is there a formal process for handing care back to the optometrists?
9. Do you anticipate any risks or problems associated with the new model of care? (Prompt: does the hospital e-health record support information sharing between referrer and clinic? Is expertise of clinic staff and channels for interdisciplinary support sufficient?)
10. What are your expectations for the new clinic and how it may change over time?
